# Supplementary material for: Morphology-controlled preparation and enhanced simulated sunlight and visible-light photocatalytic activity of Pt/Bi5Nb3O15 heterostructures
Source: Royal Society of Chemistry journal article supplement (doi:10.1039/c3cp00084b), 2013-01-01

## Electronic Supplementary Information

### **Morphology-controlled preparation and enhanced simulated sunlight and visible-light photocatalytic activity of Pt/Bi<sub>5</sub>Nb<sub>3</sub>O<sub>15</sub> heterostructures**

Ling Chen<sup>1</sup>, Wan Guo<sup>1</sup>, Yuxin Yang<sup>2</sup>, Ang Zhang<sup>3</sup>, Shengqu Zhang<sup>1</sup>, Yihang Guo<sup>1,\*</sup>,

Yingna Guo<sup>1,\*</sup>

Fig. S1 XRD patterns of CTAB-directed  $\text{Bi}_5\text{Nb}_3\text{O}_{15}$  prepared under various hydrothermal times. Molar ratio of starting Nb: CTAB = 1.4: 2.

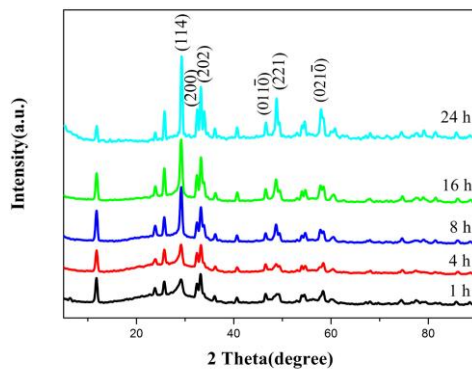

Supplement: c3cp00084b.pdf [file c3cp00084b.pdf]
